# Supplementary material
Source: HighWire-hosted journal article supplement (https://jnm.snmjournals.org/highwire/filestream/95091/field_highwire_adjunct_files/0/185470_Supplemental_Data.pdf)
Supplement: 185470_Supplemental_Data.pdf [file 185470_Supplemental_Data.pdf]

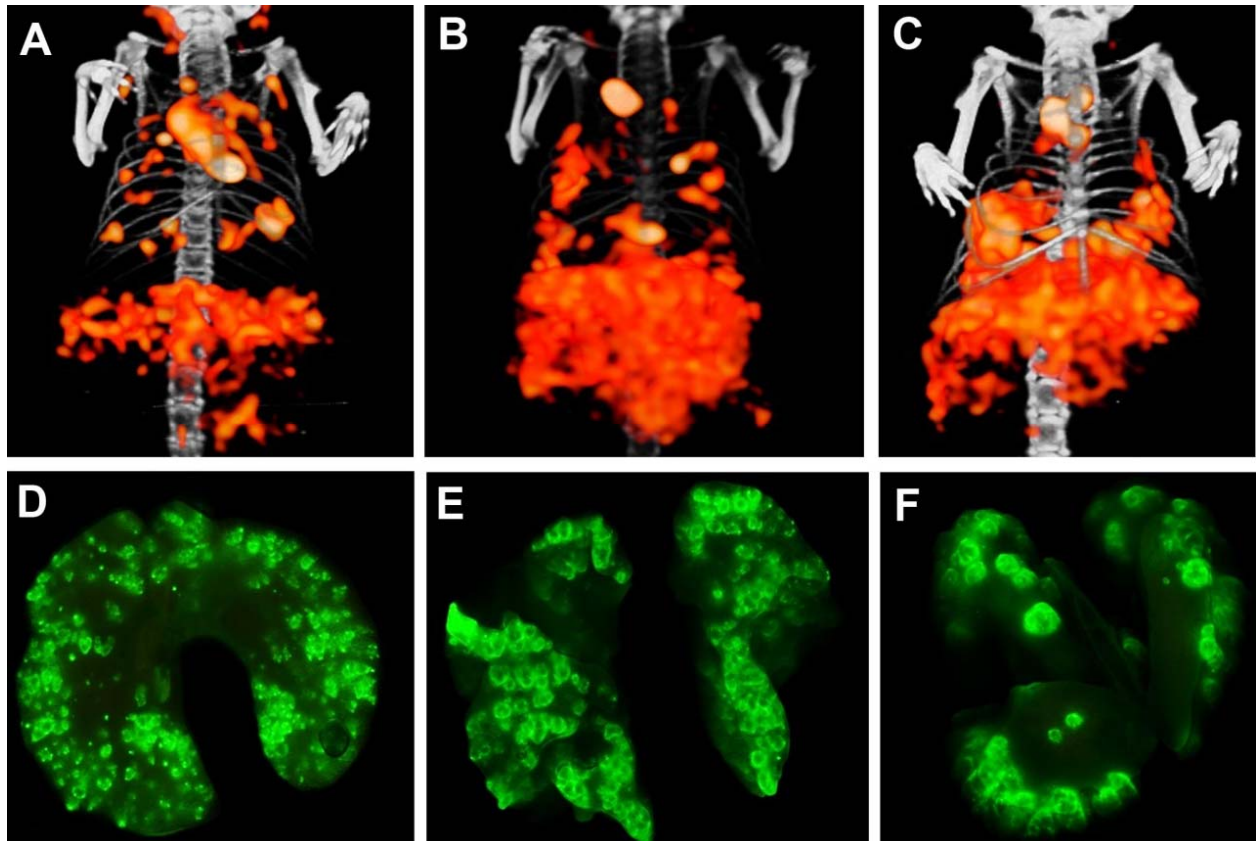

Supplemental Figure 1: Overview of dual-modality imaging (upper row, microSPECT/CT; lower row, Odyssey fluorescence imaging of resected lungs) in mice after 2 (A, D), 3 (B, E), and 4 (C, F) weeks of tumor growth.

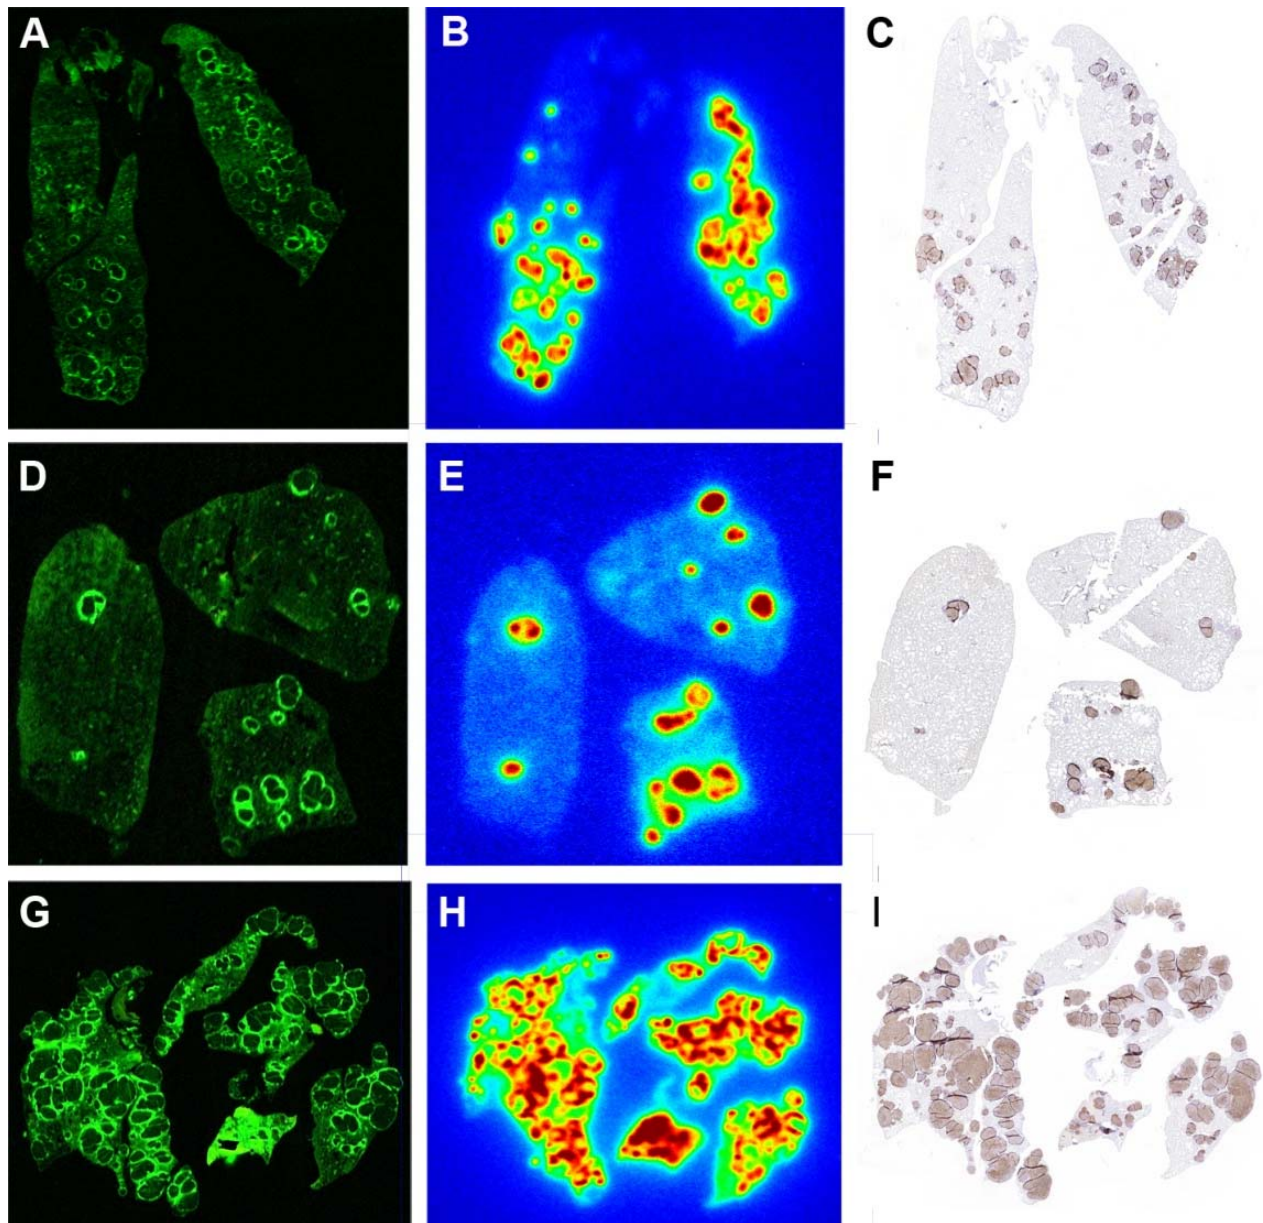

Supplemental Figure 2: Representative examples of sets (fluorescence imaging, autoradiography, and CEA staining) of adjacent slices of pulmonary metastases from mice from week 2 (A-C), week 3 (D-F), and week 4 (G-I). Fluorescence imaging with a flatbed fluorescence scanner and autoradiography of 5- $\mu$ m sections of lung tissue show the colocalization of dual-labeled labetuzumab in CEA-expressing tumor lesions. During the experiment, the tumors showed increasing central necrosis, and therefore uptake of dual-labeled labetuzumab was mainly in the periphery of the tumor lesions (Supplemental Fig. 3).



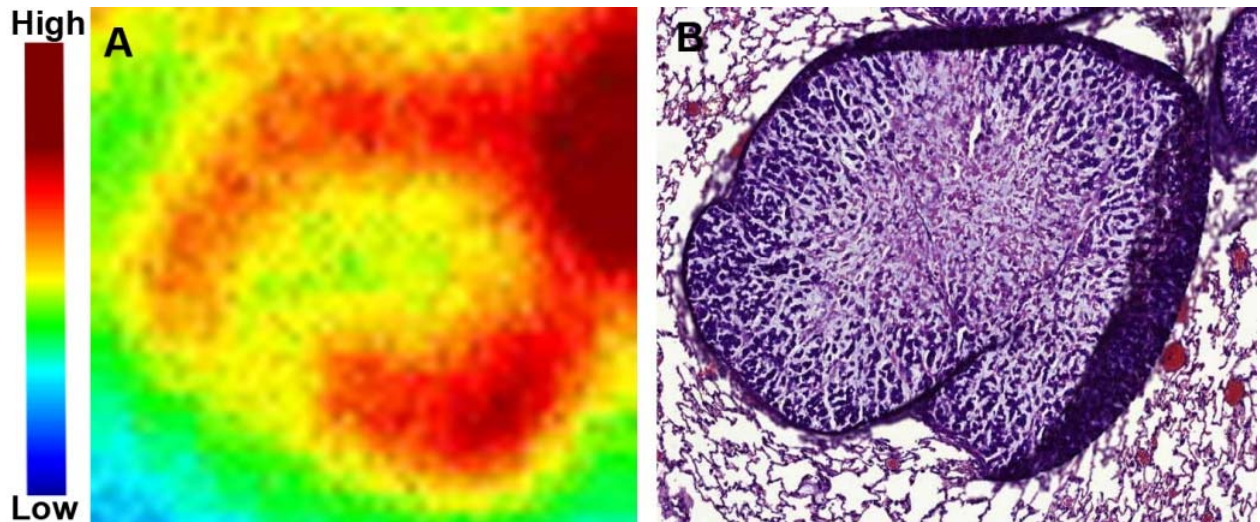

Supplemental Figure 3: Autoradiography shows mainly uptake of dual-labeled labetuzumab in the periphery of the tumor lesion (A). Extensive central necrosis is seen after 3 weeks of tumor growth on the corresponding H&E-stained slide (B).

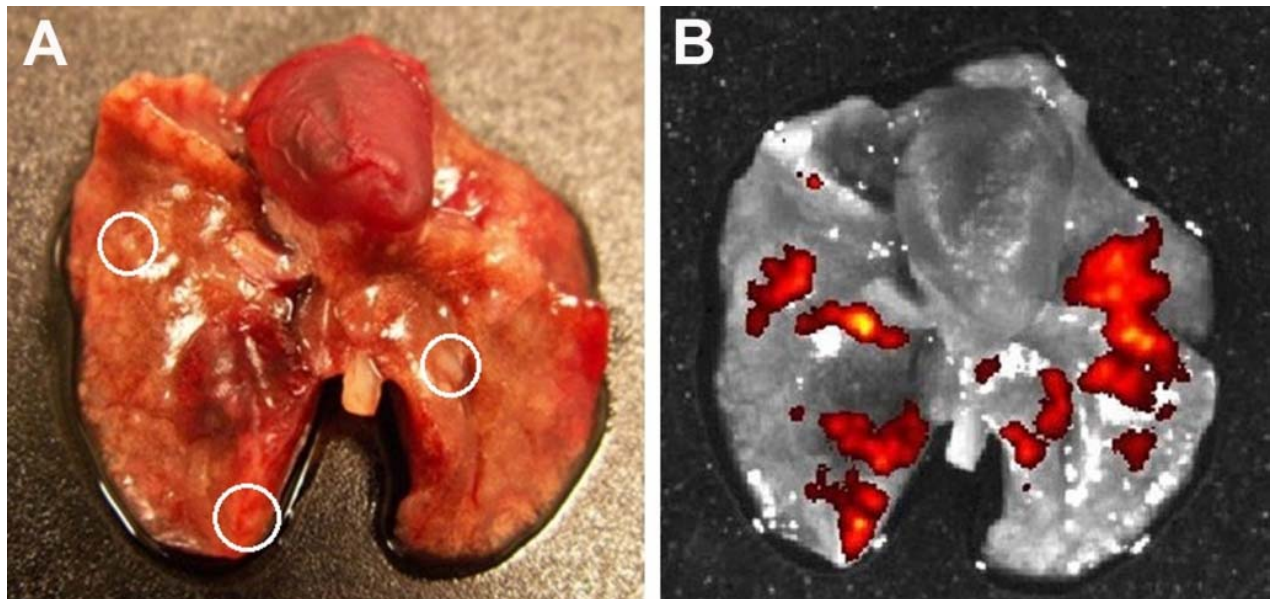

Supplemental Figure 4: *Ex vivo* example of the resected lungs and heart after 2 weeks of tumor growth. Pulmonary tumor lesions are now visible with the naked eye (white circles); however, CEA-targeted fluorescence imaging reveals multiple additional superficial pulmonary tumor lesions (histologically confirmed).

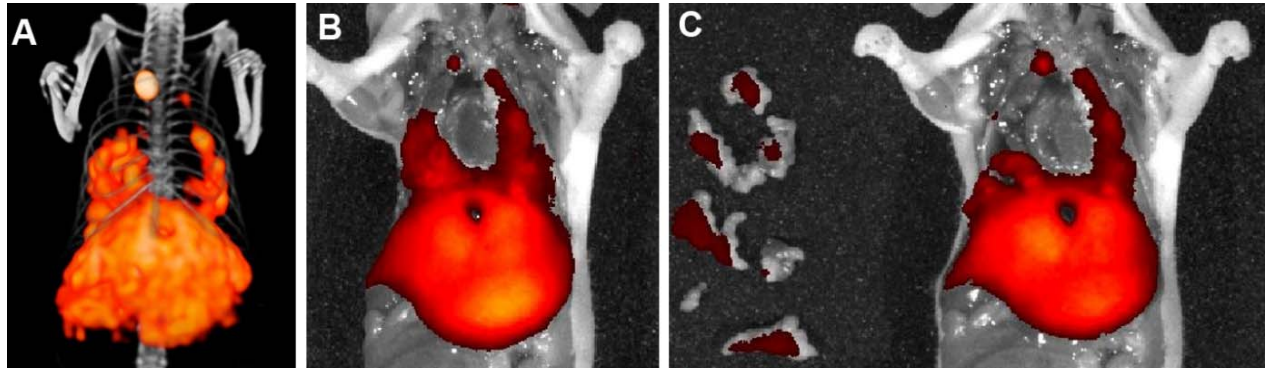

Supplemental Figure 5: Image-guided surgery after 4 weeks of tumor growth: microSPECT/CT (A), fluorescence imaging (B), and fluorescence imaging after partial resection of tumor nodules (C). Because of the high tumor density, a complete resection of all tumor nodules was not possible in this case.

Supplemental Table 1: Biodistribution of  $^{111}\text{In}$ -labetuzumab-IRDye800CW

|                                                                                                                                    | <b>Week 1</b> | <b>Week 2</b> | <b>Week 3</b> | <b>Week 4</b> |
|------------------------------------------------------------------------------------------------------------------------------------|---------------|---------------|---------------|---------------|
| <b>Blood</b>                                                                                                                       | 16.5 (2.8)    | 12.1 (3.4)    | 9.3 (1.8)     | 7.7 (1.3)     |
| <b>Muscle</b>                                                                                                                      | 1.3 (0.1)     | 0.9 (0.3)     | 0.7 (0.1)     | 0.6 (0.3)     |
| <b>Heart</b>                                                                                                                       | 6.8 (2.0)     | 6.3 (2.4)     | 4.8 (0.8)     | 3.2 (1.5)     |
| <b>Spleen</b>                                                                                                                      | 14.6 (3.5)    | 9.4 (3.0)     | 9.0 (2.6)     | 7.6 (3.8)     |
| <b>Pancreas</b>                                                                                                                    | 2.3 (0.4)     | 1.9 (0.6)     | 1.5 (0.3)     | 1.1 (0.5)     |
| <b>Kidney</b>                                                                                                                      | 6.7 (1.0)     | 5.5 (1.0)     | 4.2 (0.9)     | 3.7 (1.7)     |
| <b>Liver</b>                                                                                                                       | 10.0 (2.0)    | 9.6 (2.6)     | 9.6 (2.7)     | 10.5 (5.1)    |
| <b>Stomach</b>                                                                                                                     | 2.5 (0.3)     | 1.8 (0.4)     | 1.5 (0.3)     | 1.2 (0.6)     |
| <b>Duodenum</b>                                                                                                                    | 5.3 (1.1)     | 3.9 (1.3)     | 3.5 (0.9)     | 2.8 (1.3)     |
| <b>Tumor</b>                                                                                                                       | N.A.          | N.A.          | 17.2 (5.4)    | 16.5 (4.4)    |
| Values are expressed as mean ( $\pm$ SD) %ID/g. Tumor uptake could not be reliably quantified after 1 and 2 weeks of tumor growth. |               |               |               |               |
